# Supplementary material for: Low Homoarginine Levels in the Prognosis of Patients With Acute Chest Pain
Source: PubMed Central journal article supplement — J Am Heart Assoc. 2016 Apr 13;5(4):e002565. doi: 10.1161/JAHA.115.002565 (PMC4859271; doi:10.1161/jaha.115.002565), 2016-04-13

## SUPPLEMENTAL MATERIAL

**Table S1. Cross-sectional correlation analyses of homoarginine.**

| <b>Variables</b>                                 | <b>Rho</b> | <b>P-Value</b> |
|--------------------------------------------------|------------|----------------|
| Age                                              | -0.2       | <0.001         |
| Systolic Blood Pressure                          | 0.03       | 0.31           |
| Diastolic Blood Pressure                         | 0.11       | <0.001         |
| <b>Anthropometric and metabolic measurements</b> |            |                |
| BMI                                              | 0.19       | <0.001         |
| <b>Markers of renal function</b>                 |            |                |
| Cystatin C                                       | -0.16      | <0.001         |
| eGFR                                             | 0.14       | <0.001         |
| Creatinine                                       | 0.03       | 0.31           |
| <b>Blood lipids</b>                              |            |                |
| Triglycerides                                    | 0.17       | <0.001         |
| HDL                                              | -0.14      | <0.001         |
| Total Cholesterol                                | 0.02       | 0.45           |
| LDL                                              | 0.01       | 0.66           |
| <b>ECG variables</b>                             |            |                |
| QRS duration                                     | -0.01      | 0.75           |
| QTc duration                                     | -0.18      | <0.001         |

### **Arginine derivatives**

|            |       |        |
|------------|-------|--------|
| L-Arginine | 0.17  | <0.001 |
| SDMA       | -0.01 | 0.75   |
| ADMA       | -0.13 | <0.001 |

---

ADMA indicates asymmetric dimethylarginine; BMI, body mass index; eGFR, glomerular filtration rate computed using the CKD-EPI formula; HDL, high density lipoprotein; LDL, low density lipoprotein; SDMA, symmetric dimethylarginine. Homoarginine was log-transformed.

**Figure S1.** Unadjusted failure curves for the incidence of the combined endpoint comprising all-cause mortality, non-fatal stroke, and non-fatal myocardial infarction according to homoarginine cut-off (1.41  $\mu\text{mol/L}$ ) **(a)** in the overall study population ( $n=1,649$ ;  $P<0.001$  log-rank test) and **(b)** in the ACS subsample ( $n=589$ ;  $P<0.001$  log-rank test).

**Figure S1 A**

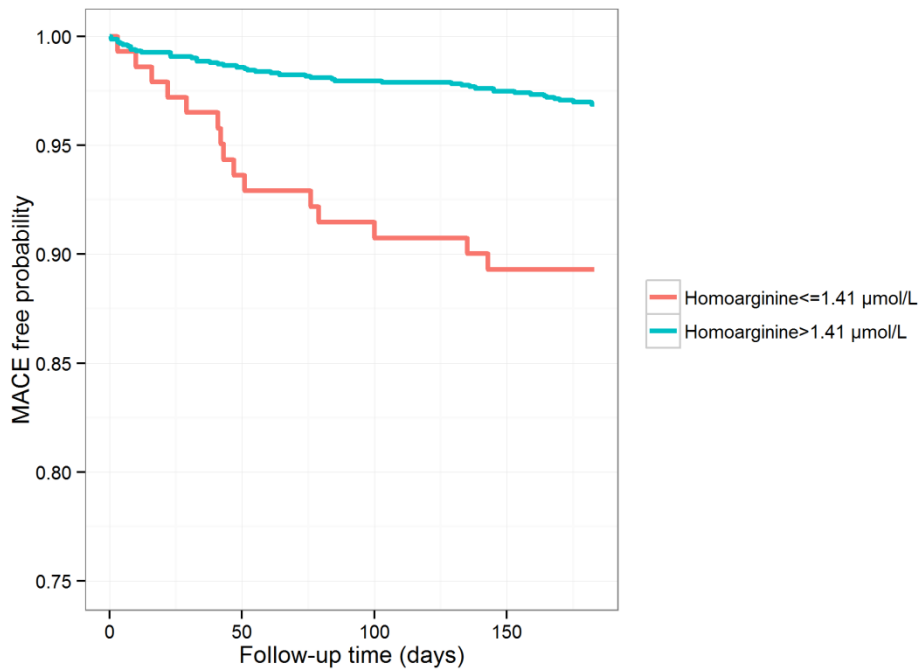

**Figure S1 B**

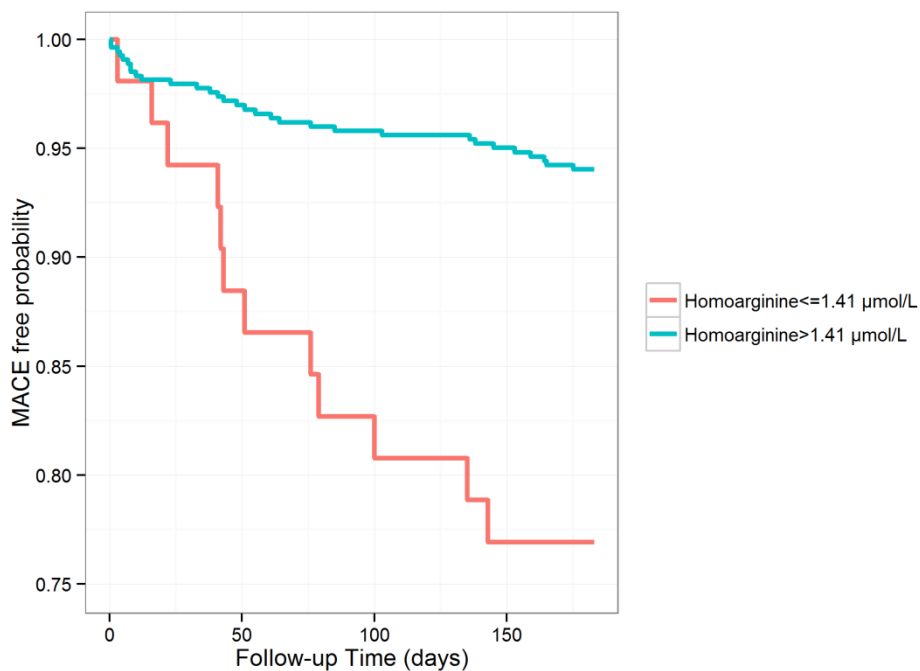

Supplement: JAH3-5-e002565-s001.pdf [file JAH3-5-e002565-s001.pdf]
